# Supplementary material for: A role for trypanosomatid aldo-keto reductases in methylglyoxal, prostaglandin and isoprostane metabolism
Source: PubMed Central journal article supplement (PMC6117947; doi:10.1042/bcj20180232), 2018-08-29
Supplement: BCJ-475-2593-s1.pdf [file BCJ-475-2593-s1.pdf]

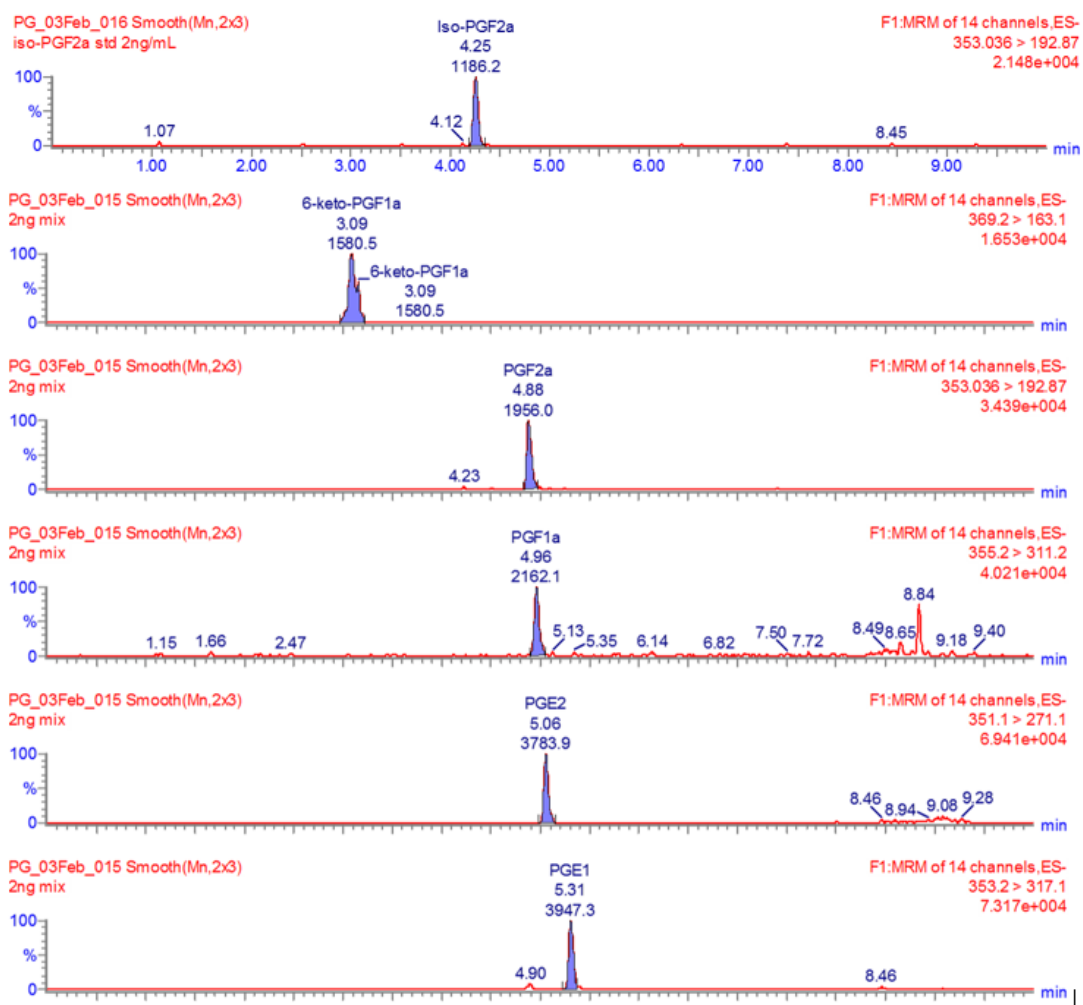

Figure S1  
 MRM chromatograms of a 2ng ml<sup>-1</sup> standard of Iso-PGF2α standard (top) and mix of prostaglandin standards at 2ng ml<sup>-1</sup> (lower 5 traces) showing retention time and peak areas obtained.
